# Supplementary material
Source: PubMed Central journal article supplement (PMC6189577)
Supplement: mmc1.pdf [file mmc1.pdf]

Cell, Volume 170

## Supplemental Information

**A Macrophage Response to *Mycobacterium leprae***

**Phenolic Glycolipid Initiates**

**Nerve Damage in Leprosy**

**Cressida A. Madigan, C.J. Cambier, Kindra M. Kelly-Scumpia, Philip O. Scumpia, Tan-Yun Cheng, Joseph Zailaa, Barry R. Bloom, D. Branch Moody, Stephen T. Smale, Alvaro Sagasti, Robert L. Modlin, and Lalita Ramakrishnan**

**Table S1 Expression of *M. leprae*-determinants in Schwann cells and oligodendrocytes, with their respective functions.**  
Related to Figure 2.

| <u>marker</u>                     | <u>interaction with <i>M. leprae</i></u>               | <u>Schwann cell function</u>                         | <u>oligodendrocyte function</u> | <u>references</u>                                   |
|-----------------------------------|--------------------------------------------------------|------------------------------------------------------|---------------------------------|-----------------------------------------------------|
| myelin basic protein              | demyelination in patients                              | myelin constituent                                   | myelin constituent              | Scollard 2006                                       |
| ErbB2                             | Mlep signalling via ErbB2 promotes proliferation       | promotes differentiation, myelination, proliferation | promotes differentiation        | Tapinos 2006; Park 2001                             |
| Laminin 2, $\alpha$ -dystroglycan | Lep ML-LBP-21 and PGL1 bind, promoting internalization | attches SC to ECM                                    | attaches oligos to ECM          | Shimoji 1999; Ng 2000; Rambukkana 1998; Leiton 2015 |

Adapted from Scollard 2008, Table I (Scollard, 2008)
